# Supplementary material for: Plasma Free Hemoglobin and Microcirculatory Response to Fresh or Old Blood Transfusions in Sepsis
Source: PubMed Central journal article supplement (PMC4416810; doi:10.1371/journal.pone.0122655), 2015-05-01
Supplement: pone.0122655.s003.pdf [file pone.0122655.s003.pdf]

**Table S1 – Two-way analysis of variance for repeated measures.**

Normality of distribution was checked through the Shapiro-Wilk normality test. Non-normally distributed variables (fHb, MFIs, De Backer score, PVD, StO<sub>2</sub> downslope, AUC StO<sub>2</sub>, HR, PaO<sub>2</sub>/FiO<sub>2</sub>) were normalized whenever possible through logarithmic or reciprocal transformation as appropriate. Data were analyzed through a two-way analysis of variance for repeated measures with Bonferroni post-hoc test. A p value <0.05 was used to indicate statistical significance. The variables Microcirculatory Flow Index and Flow Heterogeneity Index could not be normalized and the parametric statistics was not applied in these cases.

|                                             | <i>p for interaction</i> | <i>p for time point</i> | <i>p for type of RBCs</i> | <i>Bonferroni post-hoc test</i>                        |
|---------------------------------------------|--------------------------|-------------------------|---------------------------|--------------------------------------------------------|
| Hemoglobin                                  | 0.366                    | <0.001                  | 0.966                     | n.s.                                                   |
| Hematocrit                                  | 0.436                    | <0.001                  | 0.719                     | n.s.                                                   |
| Heart rate                                  | 0.413                    | 0.162                   | 0.255                     | n.s.                                                   |
| Mean Arterial Pressure                      | 0.197                    | 0.135                   | 0.005                     | p<0.01, fresh Vs. old RBCs before transfusion          |
| Urine Output                                | 0.317                    | 0.612                   | 0.979                     | n.s.                                                   |
| Temperature                                 | 0.578                    | 0.130                   | 0.496                     | n.s.                                                   |
| White Blood Cells                           | 0.547                    | 0.898                   | 0.341                     | n.s.                                                   |
| Platelets                                   | 0.114                    | 0.171                   | 0.601                     | n.s.                                                   |
| pH                                          | 0.590                    | 0.007                   | 0.503                     | n.s.                                                   |
| PaO <sub>2</sub>                            | 0.614                    | 0.053                   | 0.178                     | n.s.                                                   |
| PaCO <sub>2</sub>                           | 0.731                    | 0.590                   | 0.625                     | n.s.                                                   |
| PaO <sub>2</sub> /FiO <sub>2</sub>          | 0.878                    | 0.403                   | 0.087                     | n.s.                                                   |
| Base Excess                                 | 0.505                    | 0.002                   | 0.648                     | n.s.                                                   |
| Lactate                                     | 0.802                    | 0.241                   | <0.001                    | p<0.01, fresh Vs. old RBCs before or after transfusion |
| Free Hemoglobin                             | 0.0396                   | 0.545                   | 0.670                     | n.s.                                                   |
| Microcirculatory Flow Index (small vessels) | n.a.                     | n.a.                    | n.a.                      | n.a.                                                   |
| De Backer score                             | 0.623                    | 0.491                   | 0.714                     | n.s.                                                   |
| Total small Vessel Density                  | 0.695                    | 0.223                   | 0.247                     | n.s.                                                   |
| Perfused small Vessel Density               | 0.863                    | 0.080                   | 0.356                     | n.s.                                                   |
| Proportion of Perfused small Vessels        | 0.324                    | 0.053                   | 0.248                     | n.s.                                                   |
| Flow Heterogeneity Index                    | n.a.                     | n.a.                    | n.a.                      | n.a.                                                   |
| Perfused Boundary Region                    | 0.652                    | 0.352                   | 0.693                     | n.s.                                                   |
| StO <sub>2</sub>                            | 0.543                    | 0.067                   | 0.161                     | n.s.                                                   |
| StO <sub>2</sub> downslope                  | 0.521                    | 0.019                   | 0.517                     | n.s.                                                   |
| StO <sub>2</sub> upslope                    | 0.838                    | 0.021                   | 0.705                     | n.s.                                                   |
| Area under the curve StO <sub>2</sub>       | 0.971                    | 0.574                   | 0.765                     | n.s.                                                   |
| Tissue Hemoglobin Index                     | 0.086                    | <0.001                  | 0.618                     | n.s.                                                   |

n.s. not significant, n.a. not applicable
